# Supplementary material for: Cancer-associated fibroblast phenotypes are associated with patient outcome in non-small cell lung cancer
Source: PubMed Central journal article supplement — Cancer Cell. 2024 Mar 11;42(3):396–412.e5. doi: 10.1016/j.ccell.2023.12.021 (PMC10929690; doi:10.1016/j.ccell.2023.12.021), 2024-03-11
Supplement: mmc1.pdf [file mmc1.pdf]

**Cancer Cell, Volume 42**

**Supplemental information**

**Cancer-associated fibroblast phenotypes  
are associated with patient outcome  
in non-small cell lung cancer**

**Lena Cords, Stefanie Engler, Martina Haberecker, Jan Hendrik Rüschoff, Holger Moch, Natalie de Souza, and Bernd Bodenmiller**

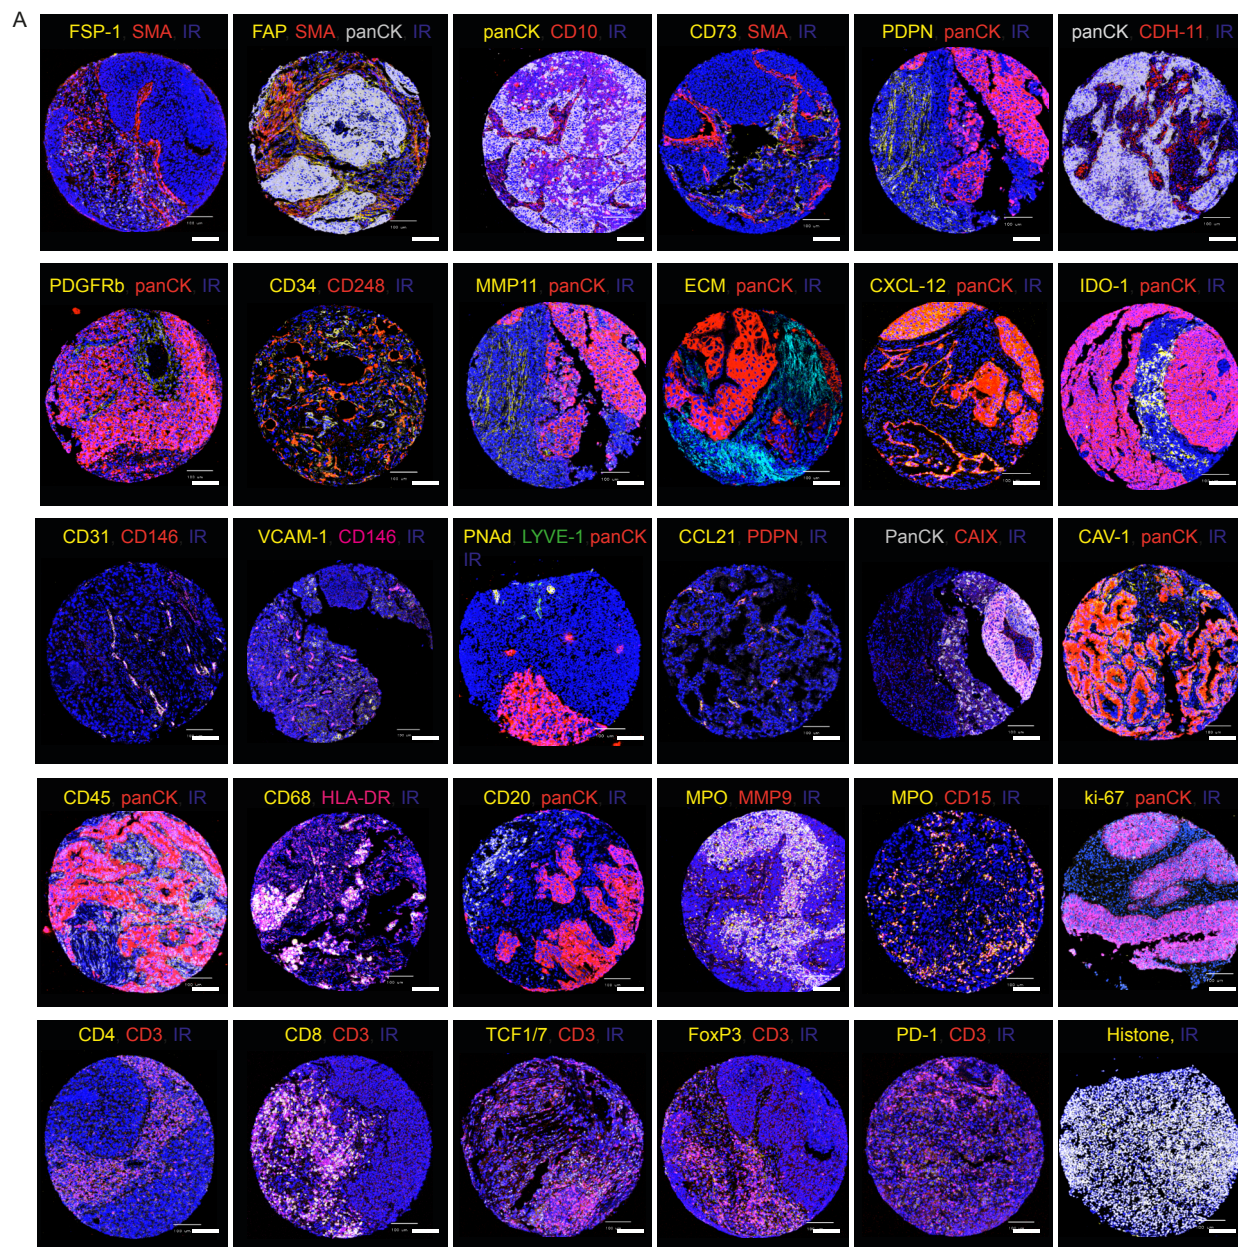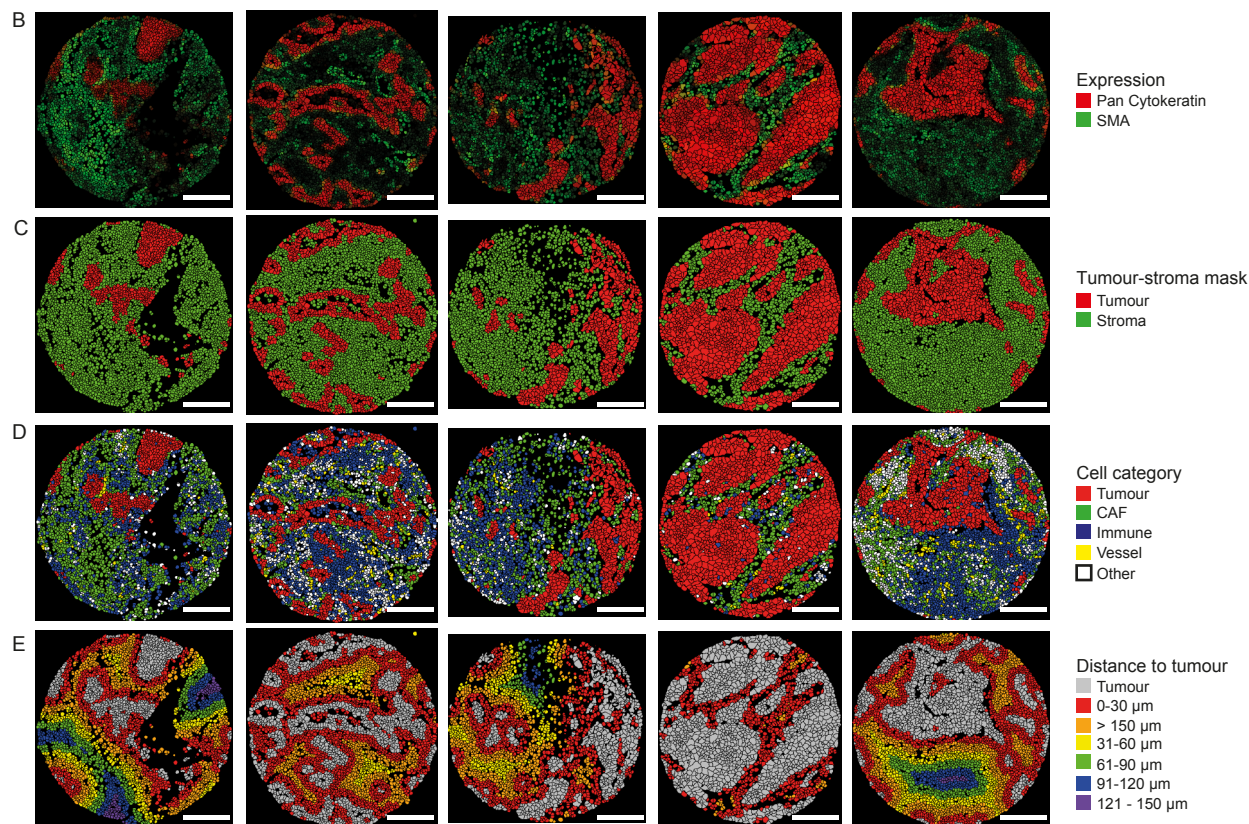

**Figure S1 – Marker expression in IMC images. Related to figures 1 and 2.**

- A) Representative images of all markers. Scale bars indicate 100  $\mu\text{m}$ .
- B) Cell masks coloured by the mean SMA (green) and panCK (red) expression per cell. Scale bars indicate 170  $\mu\text{m}$ .
- C) Cell masks pseudo-coloured stromal (green) or tumour (red) compartment. Scale bars indicate 170  $\mu\text{m}$ .
- D) Cell masks pseudo-coloured by cell category: tumour (red), immune (blue), fibroblast (green), vessel (yellow), other (white). Scale bars indicate 170  $\mu\text{m}$ .
- E) Cell masks pseudo-coloured by the distance from each cell to the closest tumour stroma border: tumour (white), 0-30  $\mu\text{m}$  (red), 31-60  $\mu\text{m}$  (orange), 61-90  $\mu\text{m}$  (yellow), 91-120  $\mu\text{m}$  (green), 121-150  $\mu\text{m}$  (blue), > 150  $\mu\text{m}$  (purple). Scale bars indicate 170  $\mu\text{m}$ .

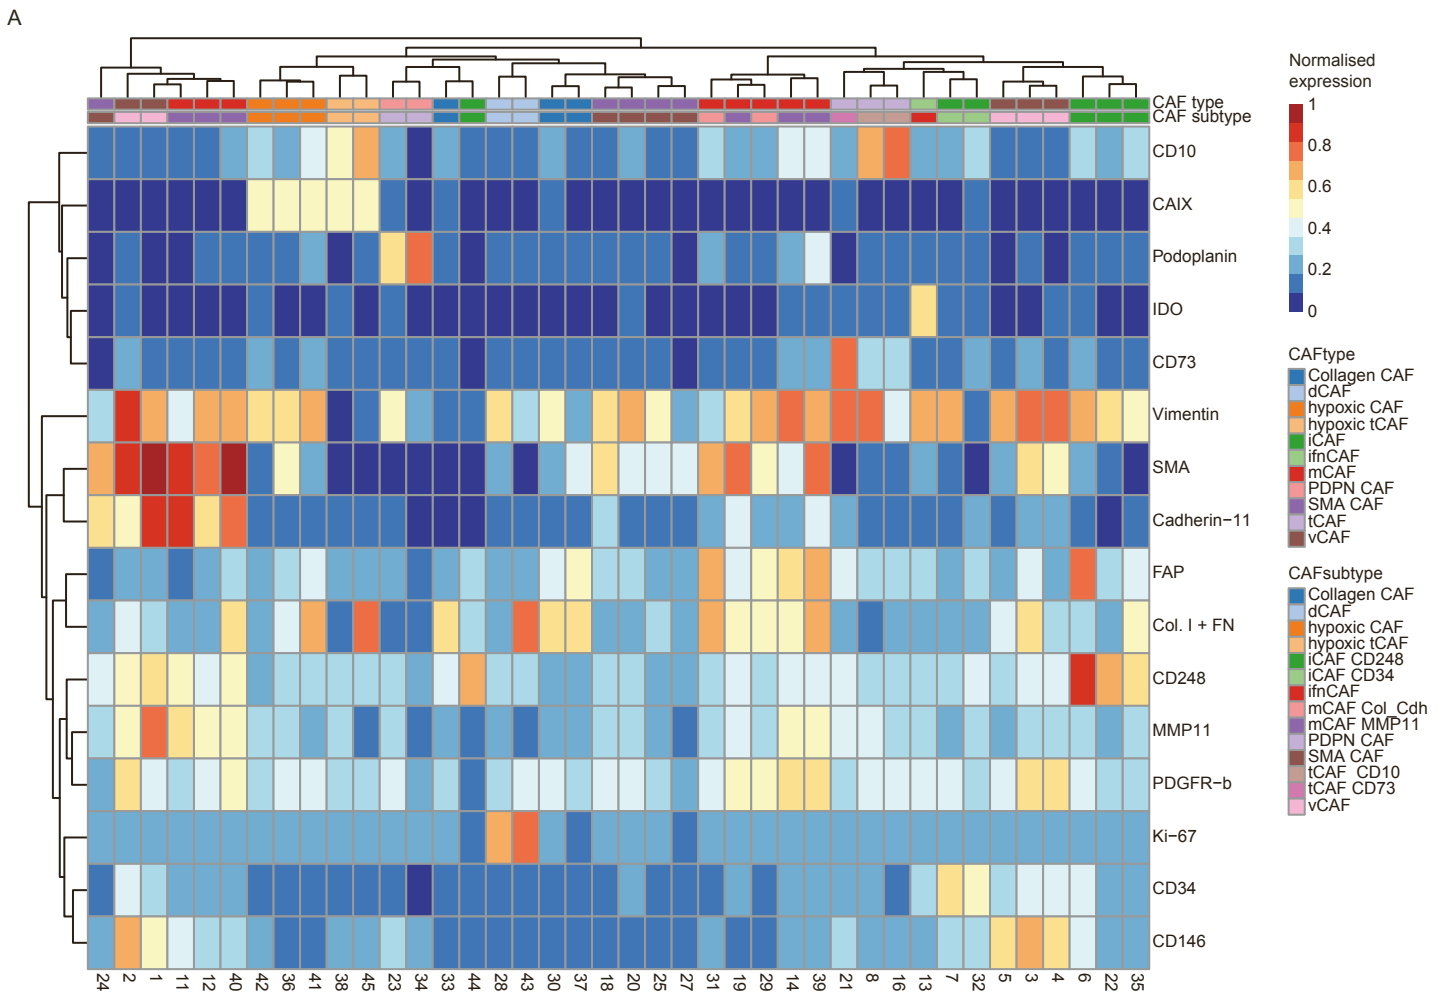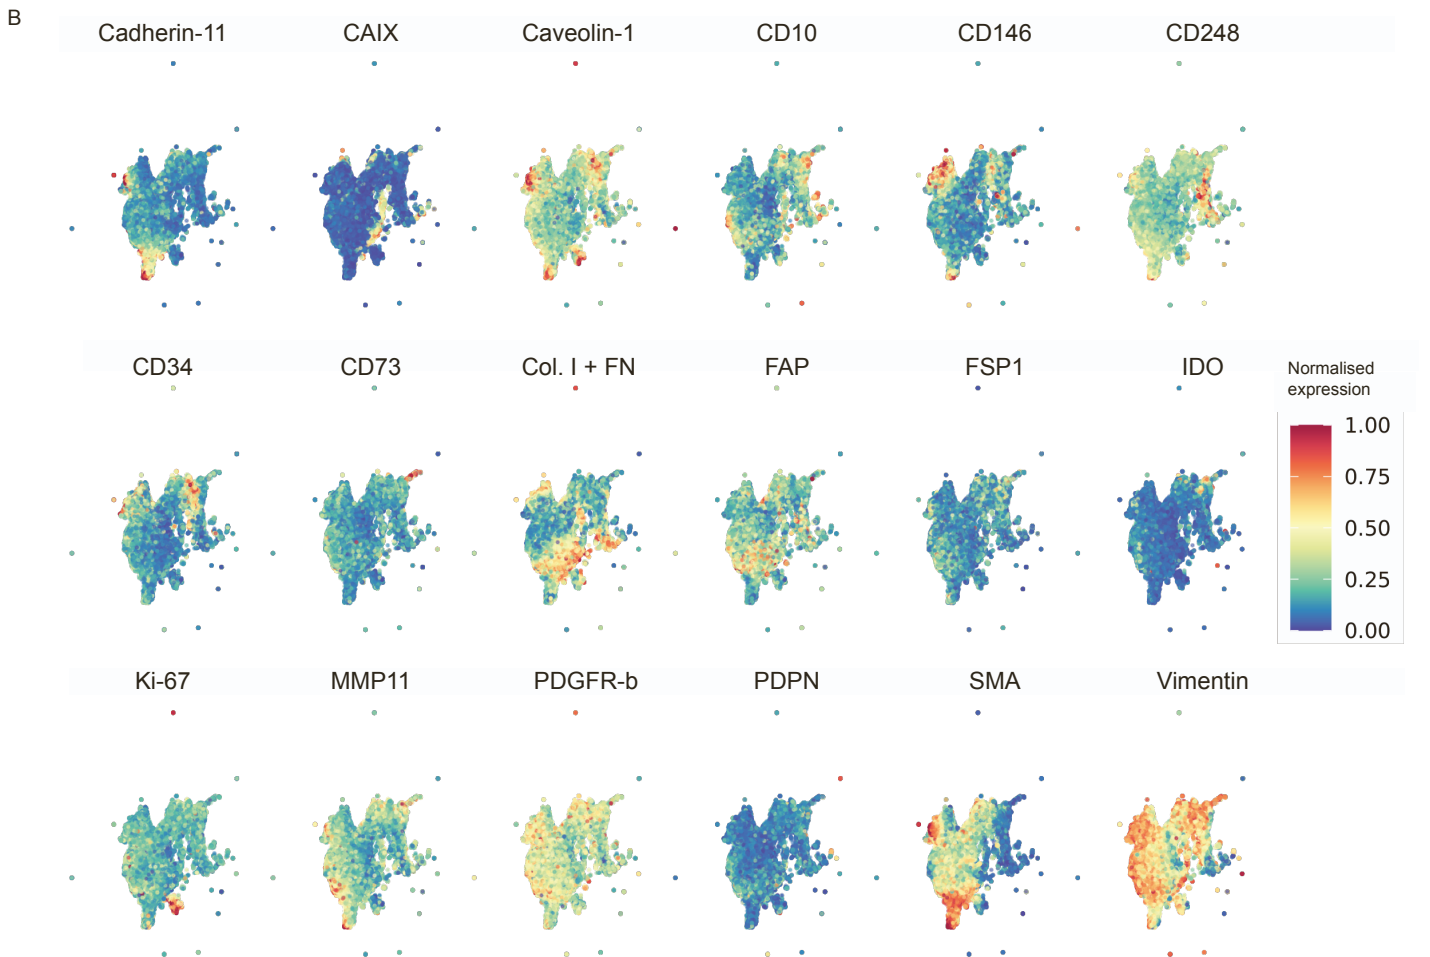

**Figure S2 – CAF phenotyping. Relates to Figure 3.**

- A) Heatmap of expression levels of CAFs clustered with FLOWSOM (k max = 45, som = 40) together with CAF type and CAF subtype.
- B) UMAP of a random subset of 200,000 cells of all fibroblasts showing the mean intensity per cell scaled from 0-1 for all CAF markers.

**A**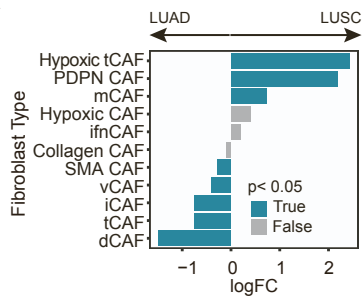**B**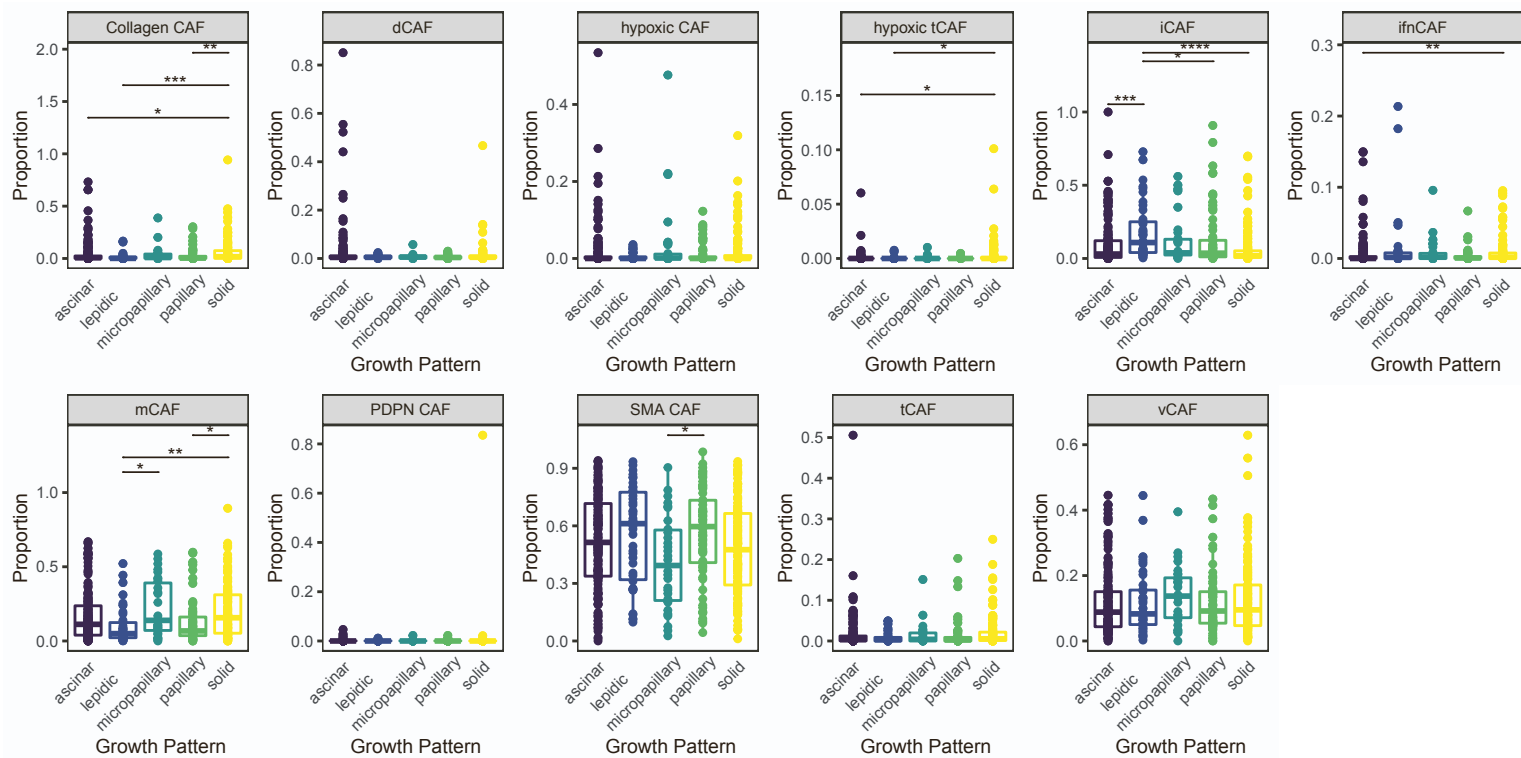**C**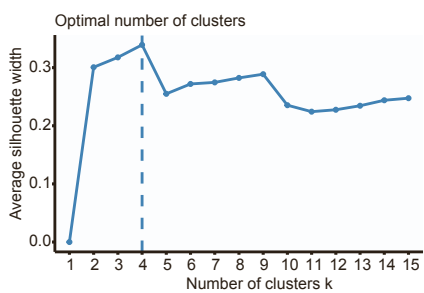**D**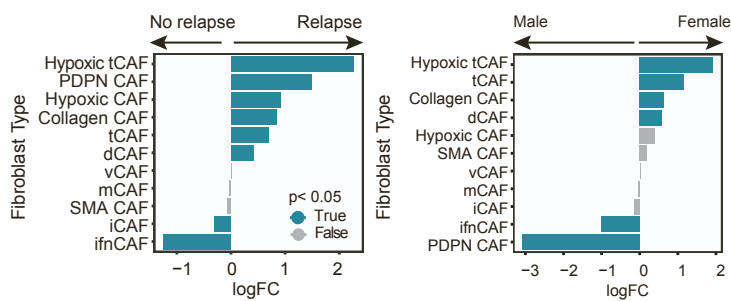**E**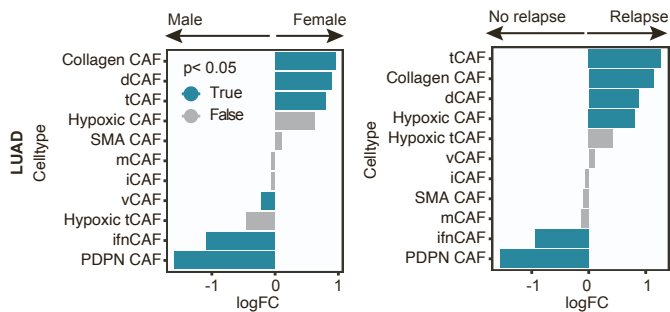**F**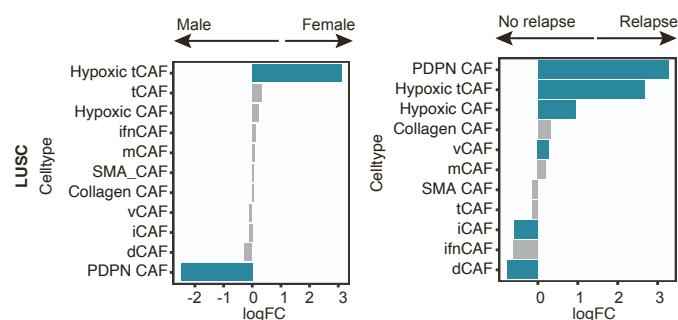

**Figure S3 – Correlation of CAF types with clinical data. Relates to figure 3.**

- A) Differential abundance analysis for CAF types over tumour types (LUAD/LUSC)
- B) Boxplots comparing the proportions of CAF types between LUAD growth patterns (acinar, lepidic, micropapillary, papillary, solid); Kruskal-Wallis: \*  $p < 0.05$ , \*\*  $p < 0.01$ , \*\*\*  $p < 0.001$ )
- C) Average silhouette width plot showing the optimal calculated cluster number for hierarchical clustering of CAF type proportions calculated per patient.
- D) Differential abundance analysis for CAF types over relapse and sex in both tumour types taken together.
- E) Differential abundance analysis for CAF type in LUAD for relapse and sex.
- F) Differential abundance analysis for CAF type in LUSC for relapse and sex

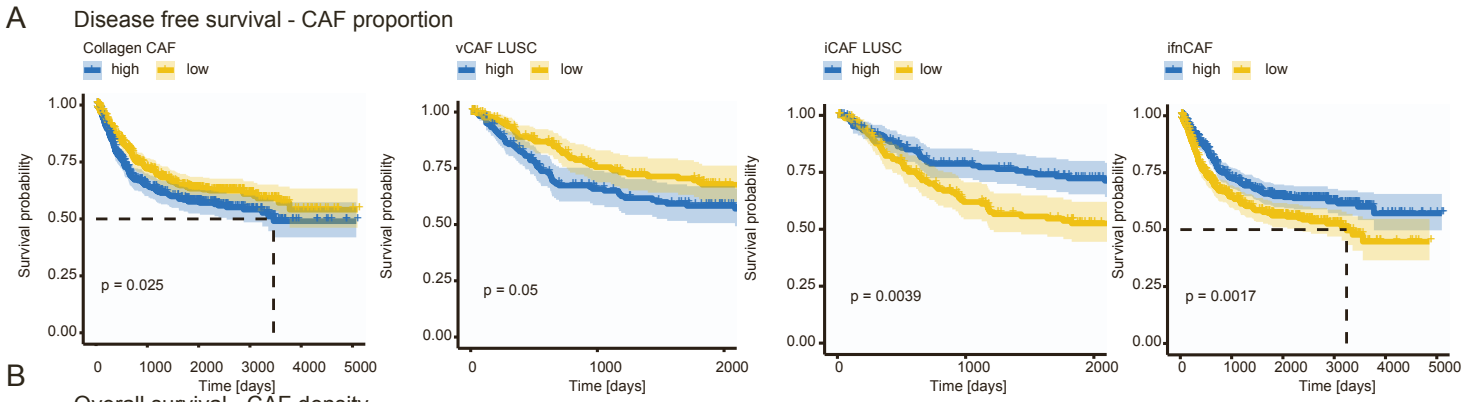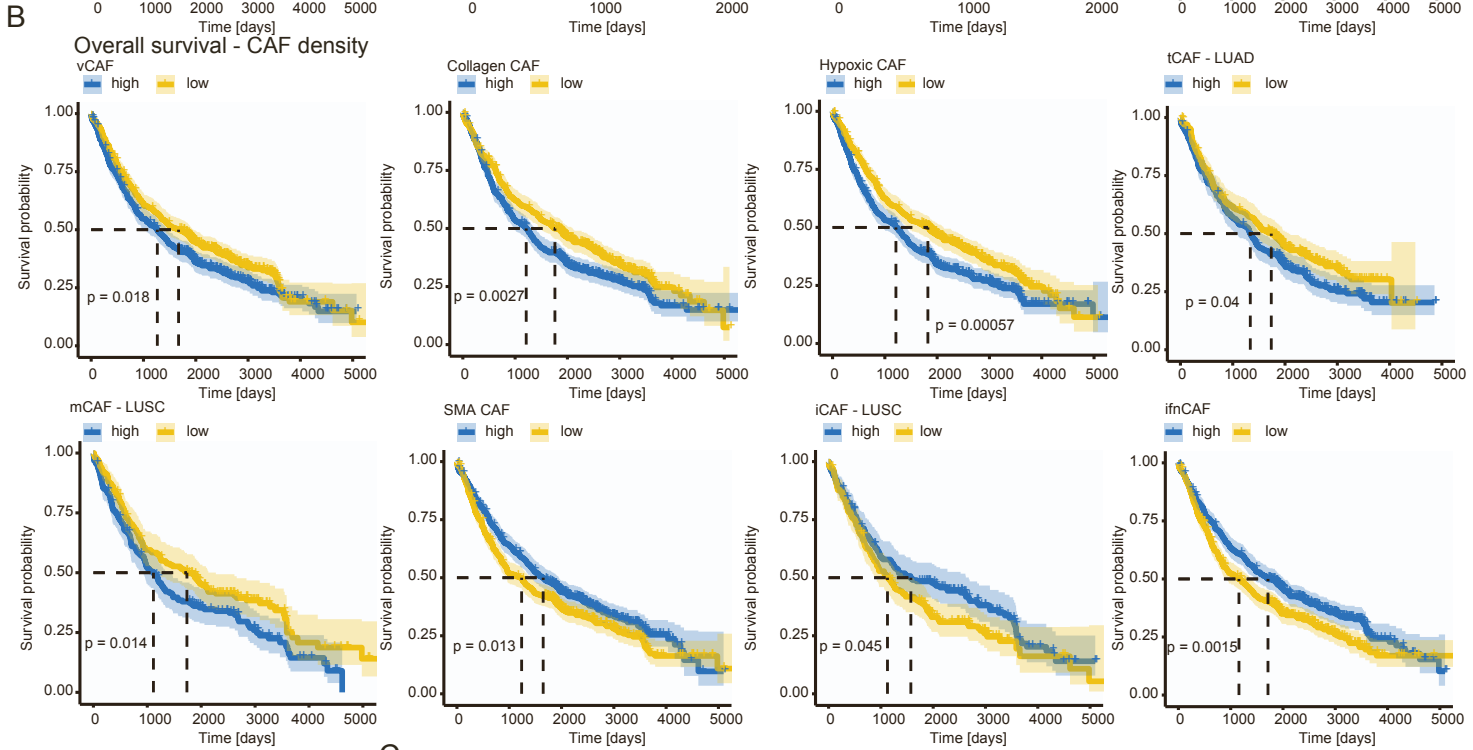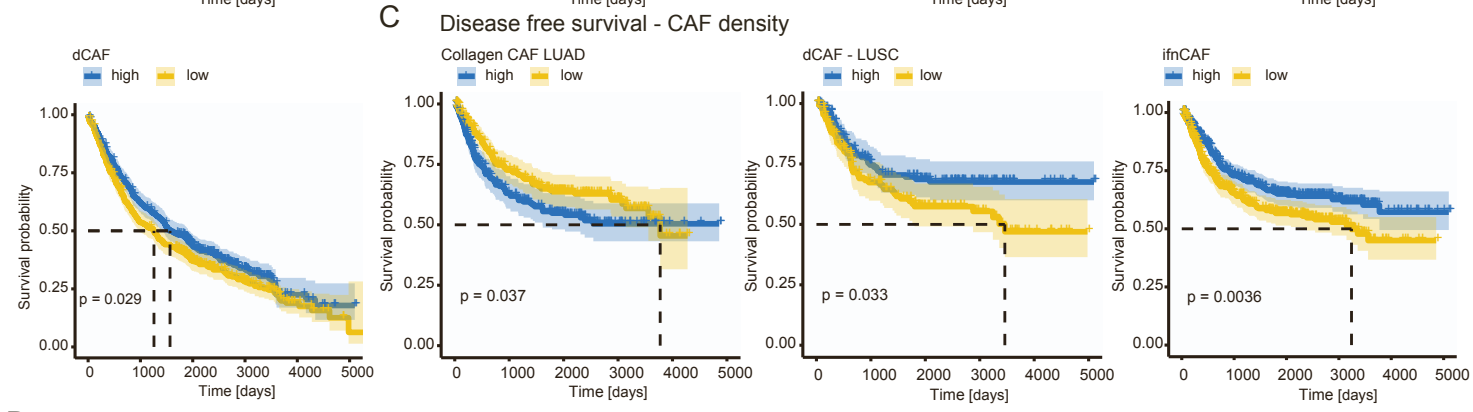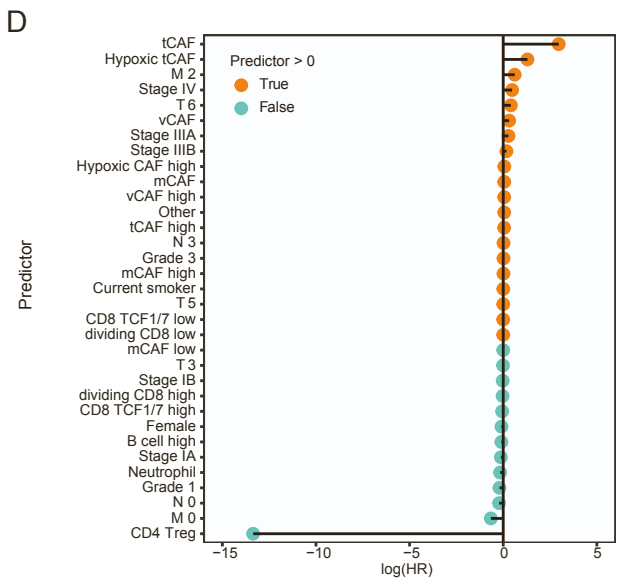



**Figure S4 – Correlation of CAF types with survival data. Relates to figure 4.**

- A) Kaplan-Meier plots of disease-free survival for patients stratified by median proportion into high and low for Collagen CAFs (all patients), vCAFs (LUSC), iCAFs (LUSC), and ifnCAFs (all patients).
- B) Kaplan-Meier plots of overall survival for patients stratified by median density into high and low for vCAFs (all patients), Collagen CAFs (all patients), hypoxic CAFs (all patients), tCAFs (LUAD), mCAFs (LUSC), SMA CAFs (all patients), iCAFs (LUSC), ifnCAFs (all patients), and dCAFs (all patients).
- C) Kaplan-Meier plots of disease-free survival for patients stratified by median density into high and low for Collagen CAFs (all patients), dCAFs (LUSC), and ifnCAFs (all patients).
- D) Lasso-regressed CoxPH model including mean CAF type density calculated per tumour core per patient as well as patient stratification into high and low for each CAF type (by median proportion) together with all available clinical data.

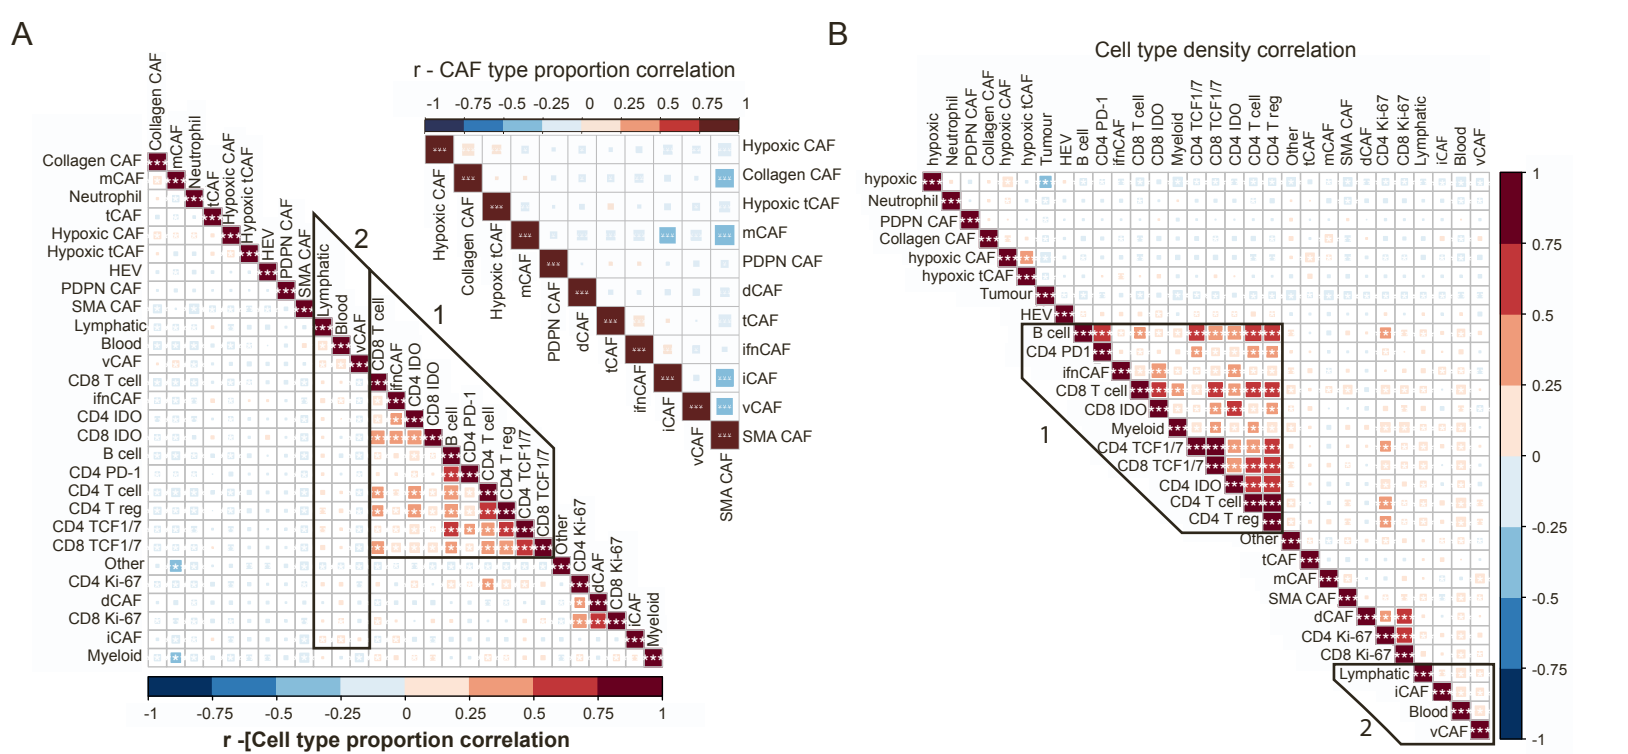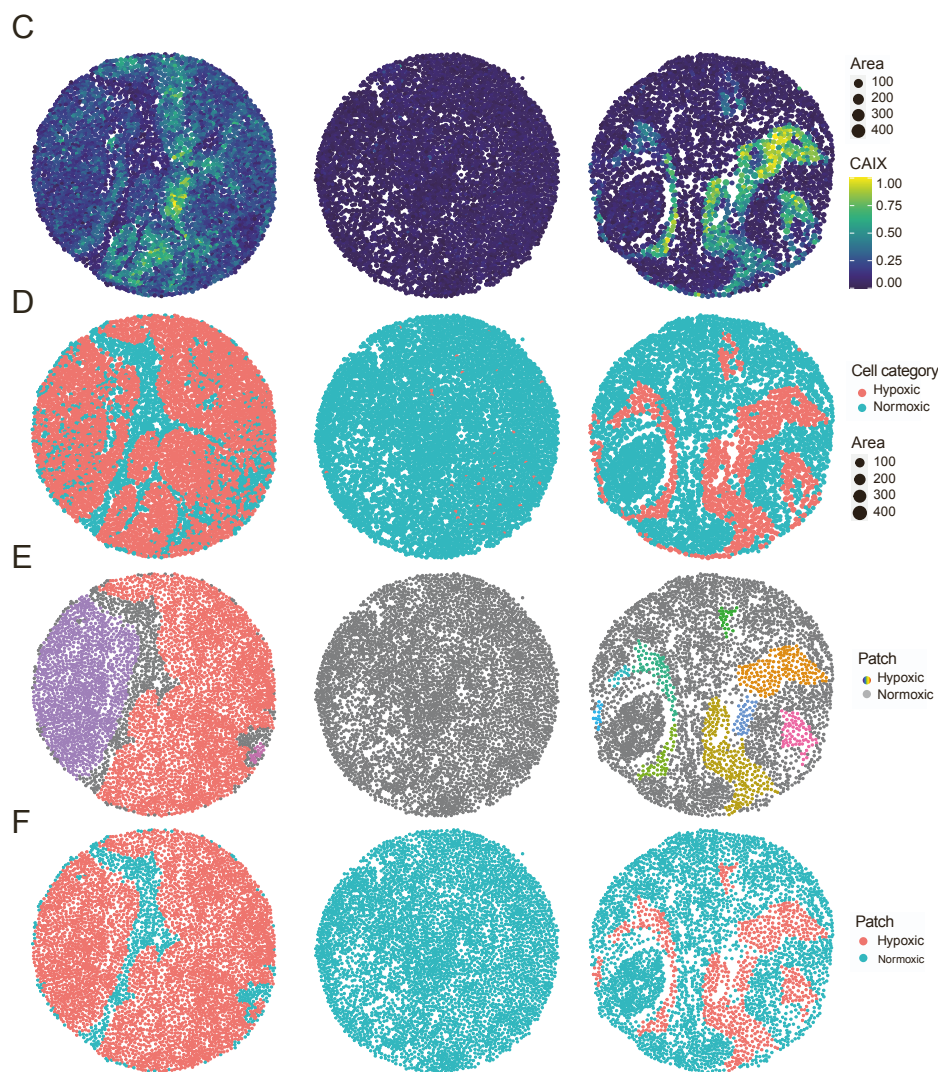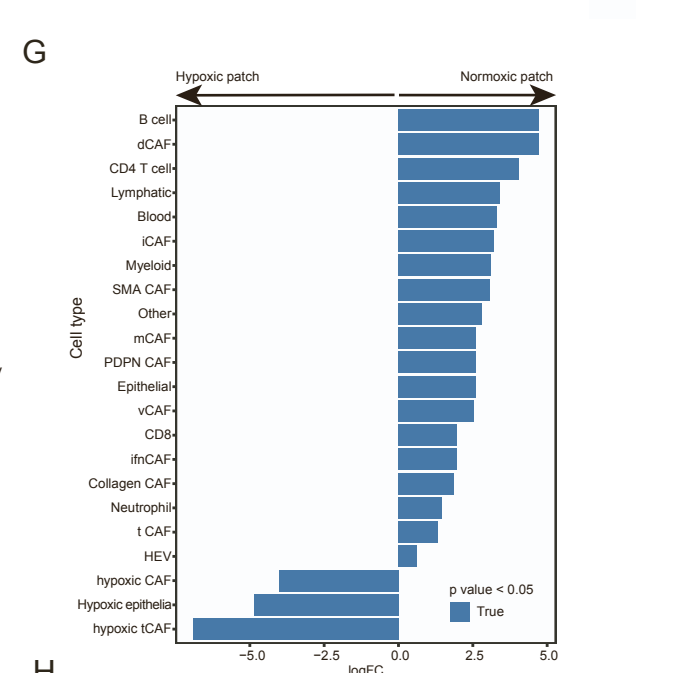

**Figure S5 – Correlation of CAF types with other cells and hypoxia. Relates to figure 6.**

- A) Correlations of the mean proportions per patient of all cell types (bottom left). Cluster 1 shows the correlation of ifnCAFs with various immune cells; cluster 2 shows the correlation of iCAFs with lymphatic and blood vessel cells and vCAFs. The second correlation matrix (top right) displays the correlation only of CAF types. (\*  $p < 0.05$ , \*\*  $p < 0.01$ , \*\*\*  $p < 0.001$ ).
- B) Correlations of the mean density per patient of all cell types (\*  $p < 0.05$ , \*\*  $p < 0.01$ , \*\*\*  $p < 0.001$ ). Cluster 1 shows the correlation of ifnCAFs with various immune cells; cluster 2 shows the correlation of iCAFs with lymphatic and blood vessel cells and vCAFs.
- C) Dot plot of three TMA cores showing the mean cellular expression of CAIX for each cell.
- D) Dot plot of three TMA cores (as in E) coloured by their categorisation as hypoxic (hypoxic epithelia, hypoxic tCAFs and hypoxic CAFs) and all normoxic cells.
- E) Dot plot of three TMA cores (as in E) showing patches calculated based on hypoxic cells.
- F) Dot plot of three TMA cores (as in E) showing patches defined as either hypoxic (red) or normoxic patches (blue).
- G) Differential abundance analysis comparing hypoxic versus normoxic patches.
- H) Correlations of all cells with hypoxic and normoxic patches.

A

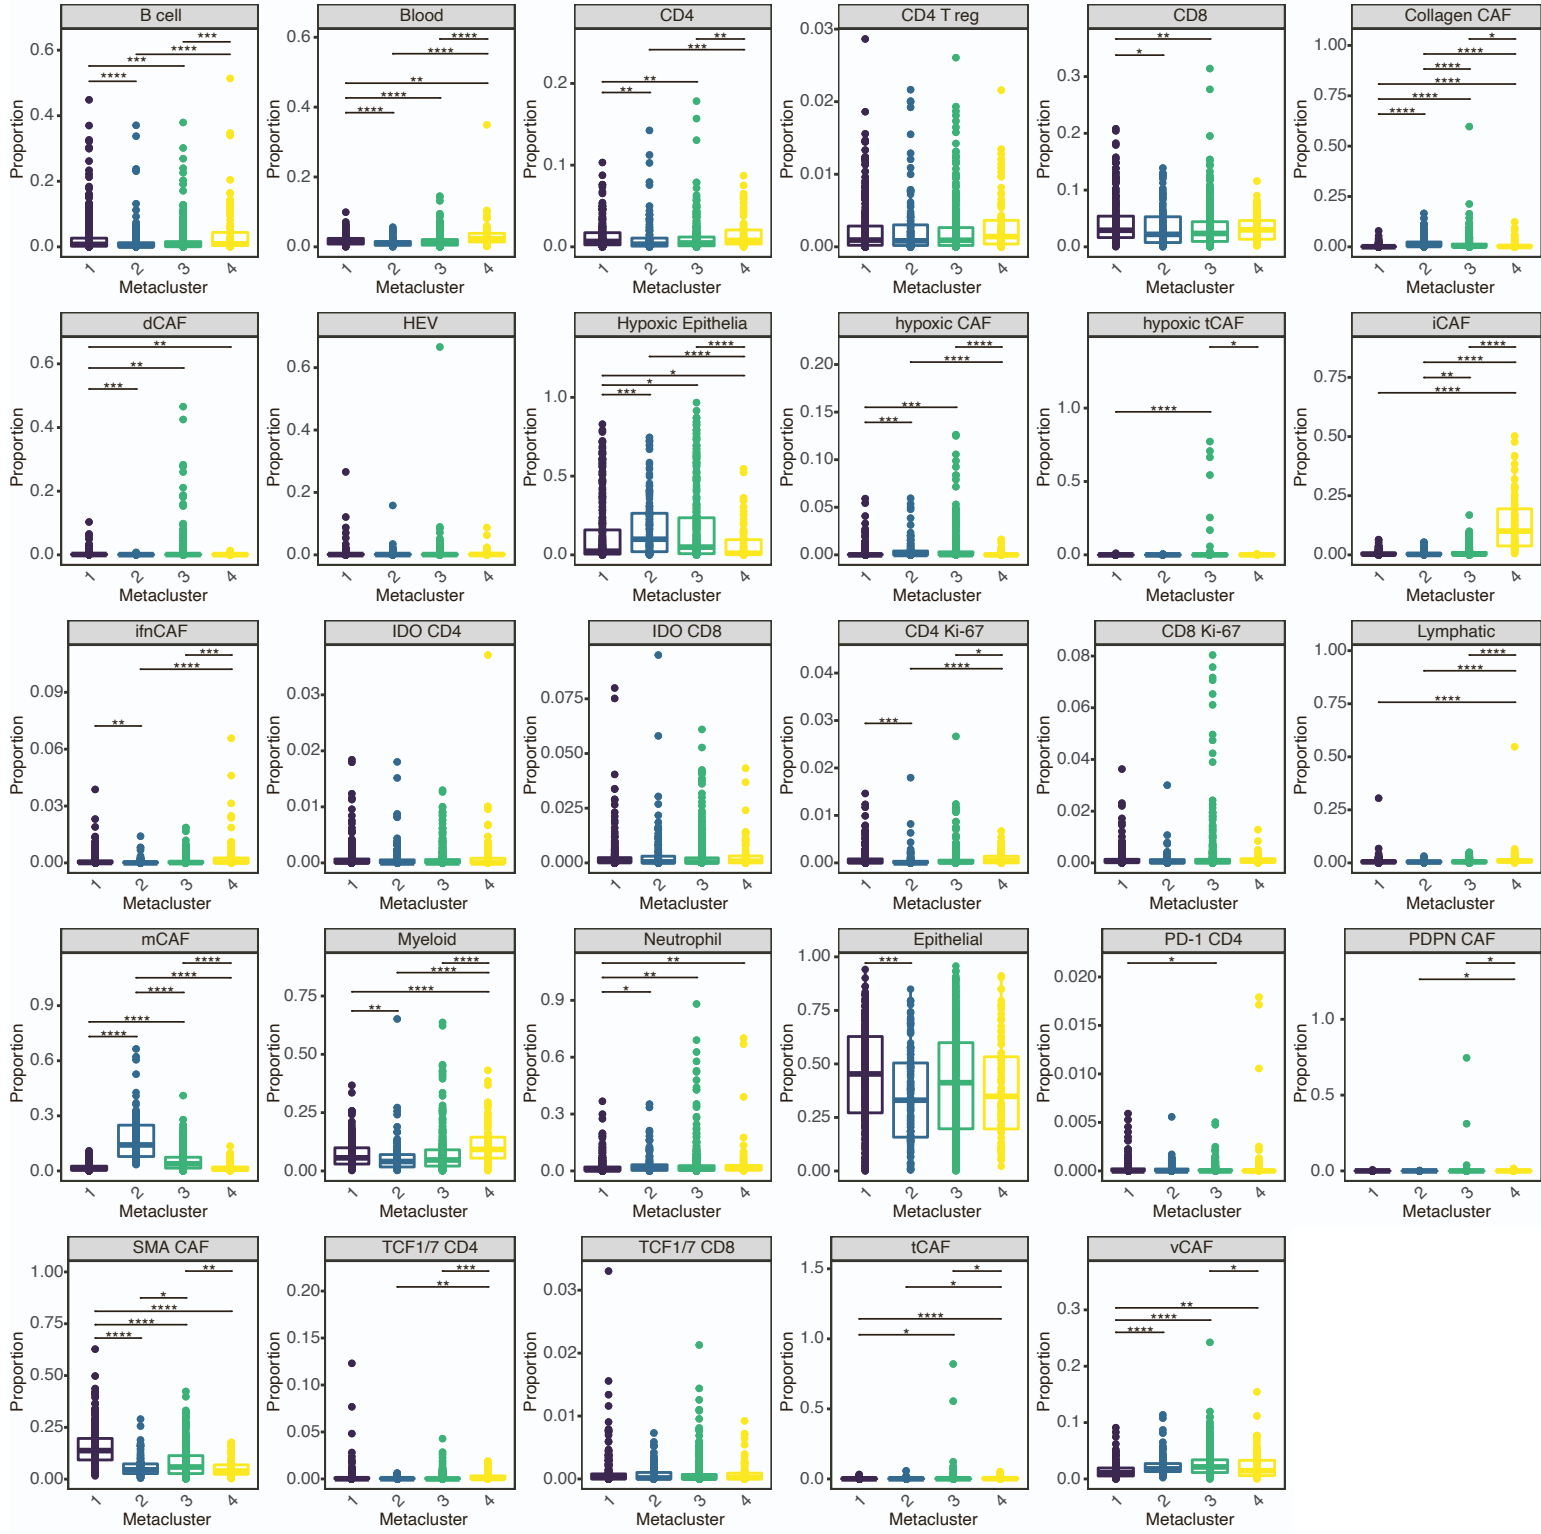

**Supplementary Figure 6 – TME composition of patients stratified by CAF types.  
Relates to figure 6.**

- A) Boxplots showing cellular enrichment of all cell types between the four meta-clustered patient groups (1, 2, 3, 4; Kruskal-Wallis: \*  $p < 0.05$ , \*\*  $p < 0.01$ , \*\*\*  $p < 0.001$ ).

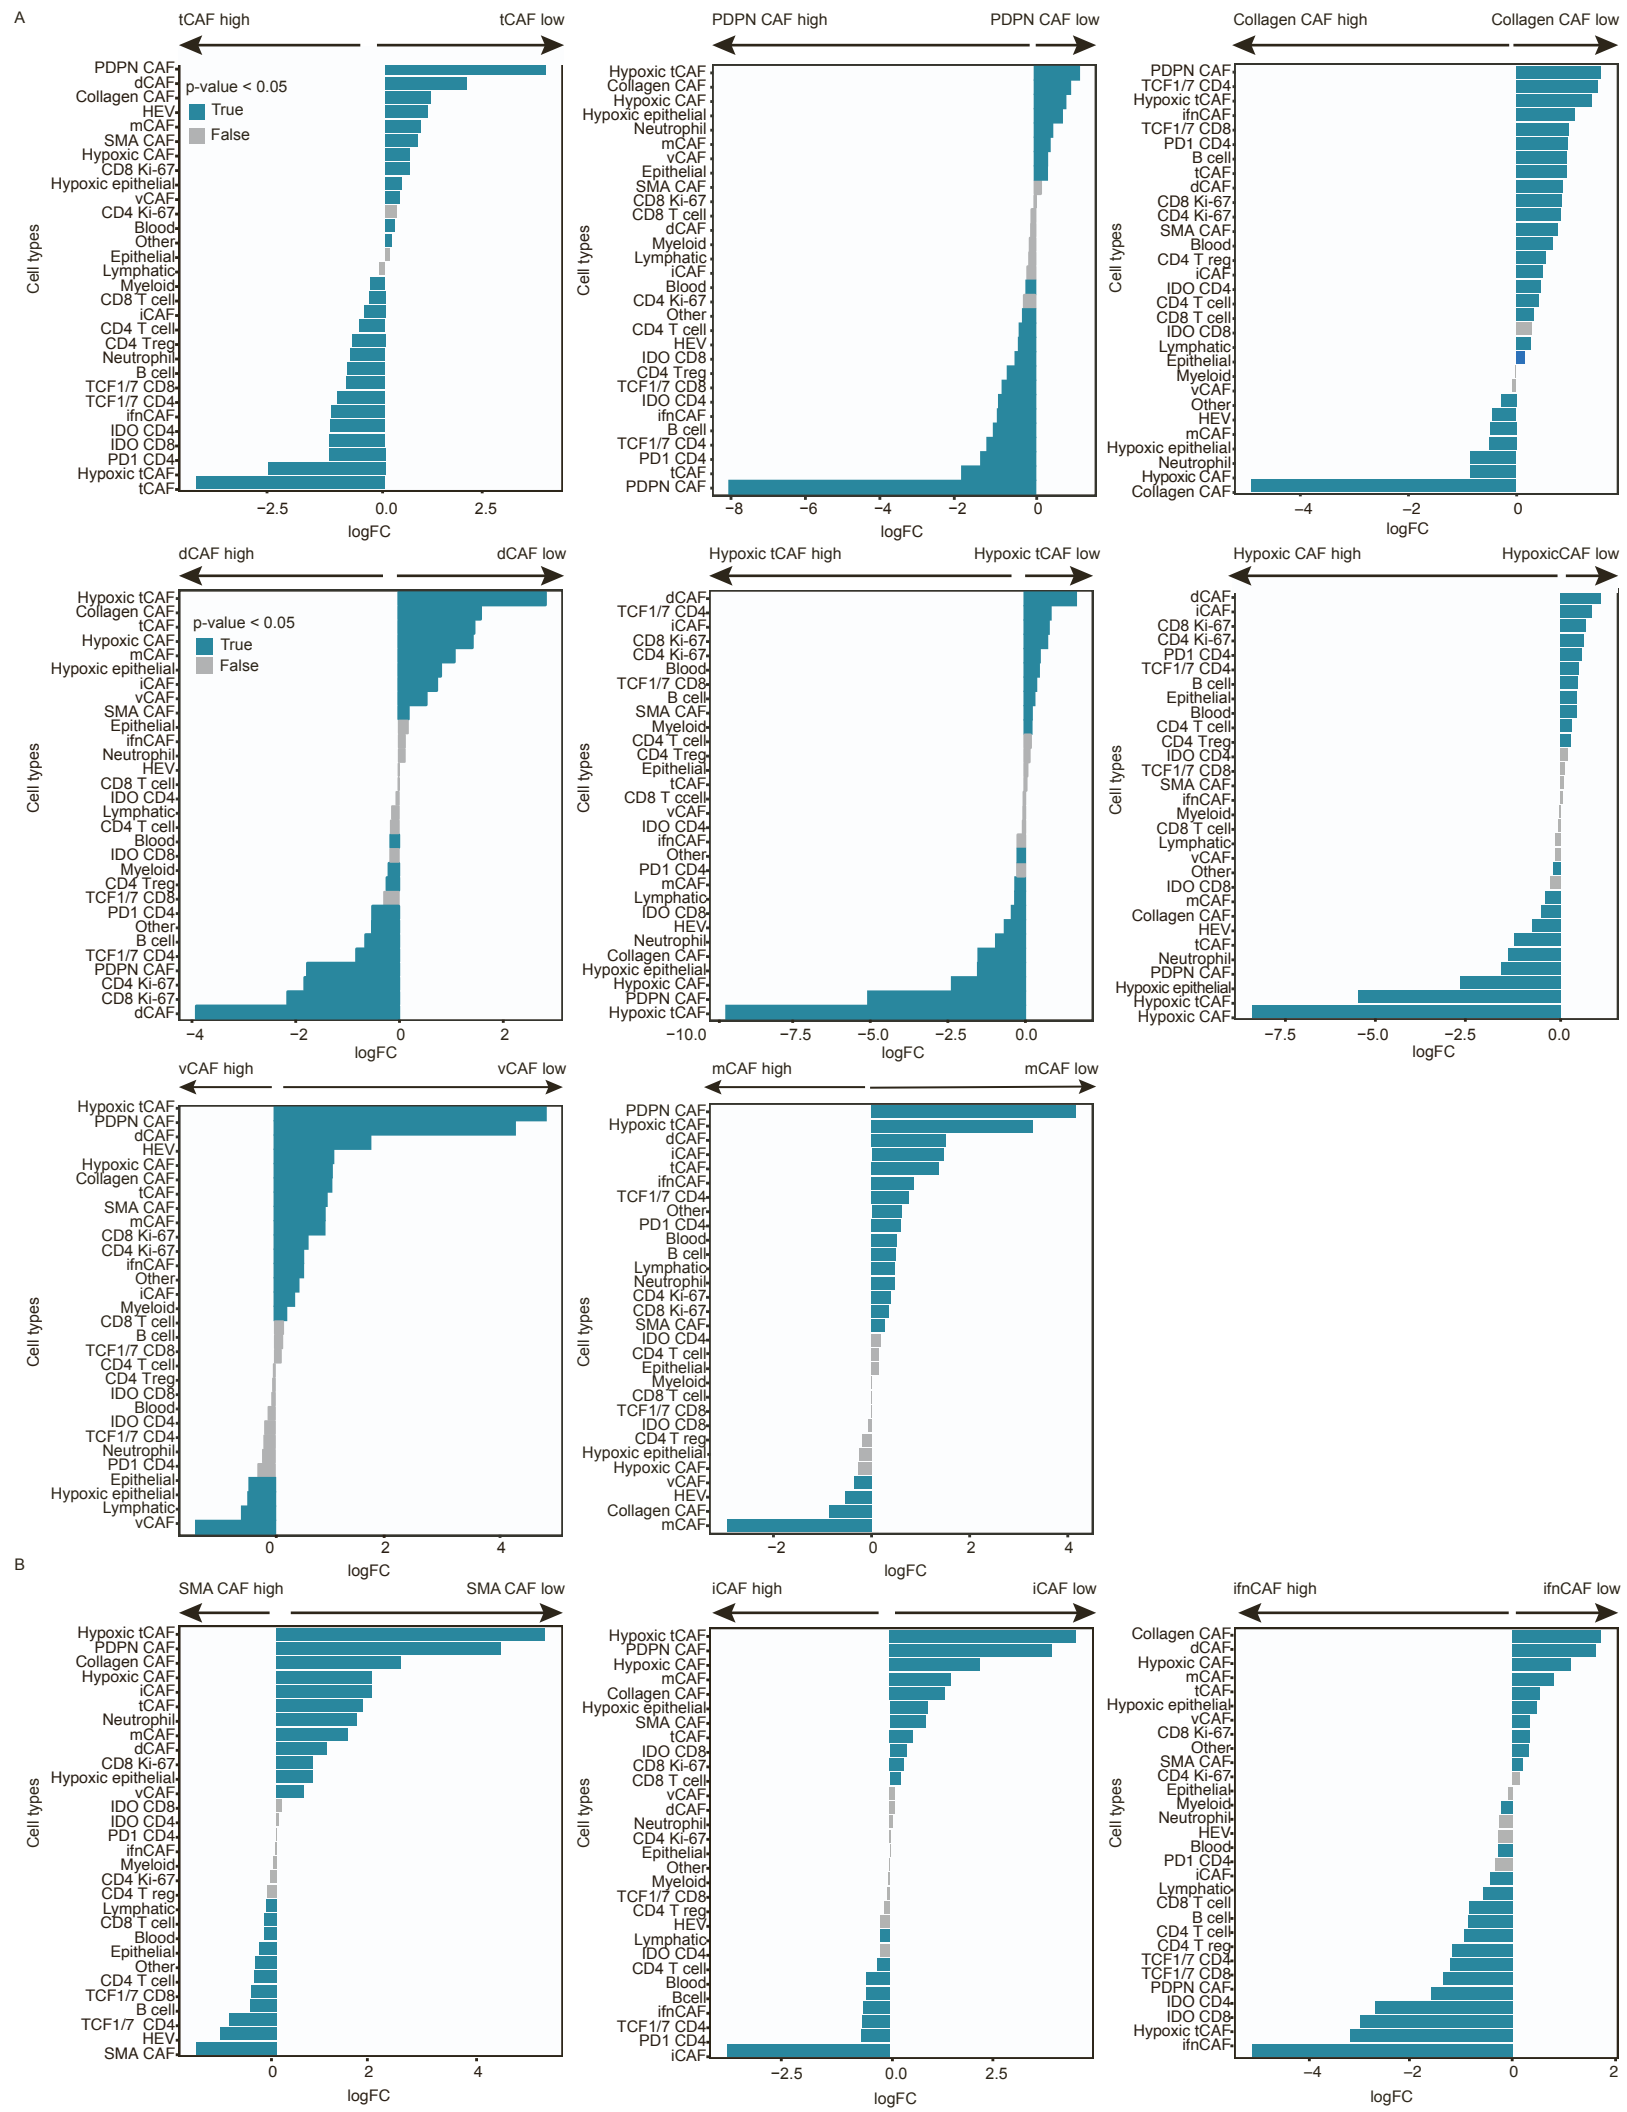

**Figure S7 – TME composition of patients stratified by CAF types.**  
**Relates to figure 6.**

- A) Differential abundance analysis of all cell types between patients stratified as high or low based on mean proportions of poor-prognosis CAF types (tCAFs, PDPN CAFs, Collagen CAFs, dCAFs, hypoxic tCAFs, hypoxic CAFs, vCAFs and mCAFs).
- B) Differential abundance analysis of all cell types between patients stratified as high or low based on mean proportions of good-prognosis CAF types (SMA CAFs, iCAFs and ifnCAFs).

Supplementary tables and legends

**Table S1 – Antibody panel. Related to STAR Methods**

| <b>Metal Tag</b> | <b>Target</b>               | <b>Antibody Clone</b> | <b>Lot</b>      | <b>Provider</b>           | <b>Catalogue Number</b> | <b>RRID</b>     |
|------------------|-----------------------------|-----------------------|-----------------|---------------------------|-------------------------|-----------------|
| Y89              | Myelo-peroxidase            | Polyclonal            | 200304<br>5     | Dako                      | A0398                   | AB_233<br>5676  |
| In113            | FSP1 / S100A4               | Polyclonal            | 312695<br>3     | Millipore                 | 136784                  | AB_108<br>07552 |
| In115            | SMA                         | 1A4                   | 218390<br>0     | eBioscience               | 14-9760-82              | AB_257<br>2996  |
| Pr141            | Histone H3                  | D1H2                  | 15              | Cell Signaling Technology | 4499BF                  | AB_105<br>44537 |
| Nd142            | CD11b                       | SP330                 | GR325<br>8740-1 | Abcam                     | ab241408                | AB_288<br>9379  |
| Nd143            | HLA-DR                      | TAL 1B5               | GR322<br>2279-4 | Abcam                     | ab20181                 | AB_445<br>401   |
| Nd144            | CD146                       | Polyclonal            | ECL03<br>19041  | R&D Systems               | AF932                   | AB_355<br>721   |
| Nd145            | Cadherin-11                 | 283416                | VLT021<br>9091  | R&D Systems               | MAB1790                 | AB_207<br>6970  |
| Nd146            | FAP                         | Polyclonal            | ZKW03<br>15081  | R&D Systems               | AF3715                  | AB_210<br>2369  |
| Sm147            | CD11b                       | M1/70                 | B18648<br>4     | Biolegend                 | 101202                  | AB_312<br>785   |
| Nd148            | VCAM1                       | EPR5047               | GR325<br>5420-4 | Abcam                     | ab215380                | AB_289<br>4839  |
| Sm149            | CD20                        | L26                   | 205997<br>6     | eBioscience               | 14-0202-82              | AB_107<br>34340 |
| Nd150            | CD68                        | KP1                   | 213029<br>1     | eBioscience               | 14-0688-82              | AB_111<br>51139 |
| Eu151            | Indoleamine 2-3-dioxygenase | SP260                 | GR325<br>9345-2 | Abcam                     | ab245737                | AB_289<br>4840  |
| Sm152            | CD3                         | Polyclonal            | GR322<br>9164-6 | Dako                      | A0452                   | AB_233<br>5677  |



|       |                          |                     |                      |                              |            |                 |
|-------|--------------------------|---------------------|----------------------|------------------------------|------------|-----------------|
| Eu153 | Podoplanin               | NC-08               | B26083<br>4          | Biolegend                    | 337002     | AB_159<br>5511  |
| Sm154 | CD11c                    | D3V1E               | 2                    | Cell Signaling<br>Technology | 45581BF    | AB_279<br>9286  |
| Gd155 | Carbonic<br>Anhydrase IX | Polyclonal          | VNQ03<br>19011       | R&D<br>Systems               | AF2188     | AB_416<br>562   |
| Gd156 | CD73                     | D7F9A               | 2                    | Cell Signaling<br>Technology | 13160BF    | AB_271<br>6625  |
| Gd158 | MMP9                     | D6O3H               | 4                    | Cell Signaling<br>Technology | 13667BF    | AB_279<br>8289  |
| Tb159 | p75 / CD271              | Polyclonal          | ANT00<br>7AN07<br>02 | Alomone labs                 | ANT-007    | AB_203<br>9968  |
| Dy161 | CD10                     | E5P7S               | 2                    | Cell Signaling<br>Technology | 65534      | AB_289<br>4842  |
| Dy162 | Vimentin                 | EPR3776             | GR286<br>525-2       | Abcam                        | ab193555   | AB_281<br>4713  |
| Dy163 | FOXP3                    | 236A/E7             | 212967<br>6          | eBioscience                  | 14-4777-82 | AB_467<br>556   |
| Dy164 | CXCL13                   | Polyclonal          | BAS03<br>17101       | R&D<br>Systems               | AF801      | AB_355<br>613   |
| Ho165 | PNAd                     | MECA-79             | B25713<br>9          | Biolegend                    | 120802     | AB_493<br>555   |
| Er166 | CD8a                     | C8/144B             | 213259<br>5          | eBioscience                  | 14-0085-82 | AB_111<br>50240 |
| Er167 | Fibronectin              | 10/Fibro-<br>nectin | 625188<br>8          | BD<br>Biosciences            | 610078     | AB_397<br>486   |
| Er167 | Collagen I               | Polyclonal          | GR325<br>3239-3      | Abcam                        | ab34710    | AB_731<br>684   |
| Er168 | LYVE-1                   | Polyclonal          | KPY01<br>19052       | R&D<br>Systems               | AF2089     | AB_355<br>144   |
| Tm169 | CD140b                   | Y92                 | GR296<br>584-4       | Abcam                        | ab215978   | AB_289<br>4841  |
| Er170 | CD34                     | EP373Y              | GR327<br>1518-1      | Abcam                        | ab198395   | AB_288<br>9381  |

|       |                       |            |                 |                     |            |                 |
|-------|-----------------------|------------|-----------------|---------------------|------------|-----------------|
| Yb171 | CD4                   | Polyclonal | YS071<br>8031   | R&D<br>Systems      | AF-379-NA  | AB_354<br>469   |
| Yb172 | vWF                   | poly wwf   | 332299<br>8     | Millipore           | AB7356     | AB_922<br>16    |
| Yb172 | CD31                  | EPR3094    | GR322<br>9164-6 | Abcam               | ab207090   | AB_288<br>9382  |
| Yb173 | CXCL12 /<br>SDF-1     | 79018      | JOJ051<br>9031  | R&D<br>Systems      | MAB350-100 | AB_208<br>8149  |
| Yb174 | CCL21 /<br>6Ckine     | Polyclonal | AYJ218<br>071   | R&D<br>Systems      | AF366      | AB_355<br>327   |
| Lu175 | Keratin<br>Epithelial | AE3        | 325545<br>7     | Millipore           | MAB1611    | AB_213<br>4409  |
| Lu175 | Pan<br>Cytokeratin    | AE1        | 325291<br>0     | Millipore           | MAB1612    | AB_213<br>2794  |
| Pt194 | Ki-67                 | B56        | 811675<br>1     | Becton<br>Dickinson | 556003     | AB_396<br>287   |
| Bi209 | CD45                  | 2B11       | 200342<br>2     | eBioscience         | 14-9457-82 | AB_110<br>63696 |

**Table S1.** List of all antibodies used in this study, their respective metal tag, clone number and vendor information, RRID (Research Resource Identifiers) and catalogue number.

**Table S2 – Distribution of different cell classes in the stromal and tumour compartment. Related to STAR Methods**

|            | Stroma [n] | Stroma [%] | Tumour [n] | Tumour [%] |
|------------|------------|------------|------------|------------|
| Fibroblast | 894478     | 82.3       | 192200     | 17.7       |
| Immune     | 522302     | 63.5       | 299903     | 36.5       |
| Other      | 387435     | 65.8       | 201453     | 34.2       |
| T cell     | 265970     | 74.5       | 90939      | 25.5       |
| Tumour     | 149901     | 5.0        | 2829811    | 95.0       |
| vessel     | 124863     | 83.2       | 25199      | 16.8       |

**Table S2.** Number of cells and percentage within tumour and stroma subsets.

**Table S3 – Number of cells in bins measured from the tumour-stroma border. Related to STAR Methods**

| Bins in $\mu\text{m}$ from tumour-stroma border | Area                      | Fibroblast [n] | Immune [n] | Other [n] | T cell [n] | Tumour [n] | Vessel [n] |
|-------------------------------------------------|---------------------------|----------------|------------|-----------|------------|------------|------------|
| (>0)                                            | Tumour                    | 192100         | 299765     | 201349    | 90902      | 2829644    | 25183      |
| -10 to -0                                       | Stroma – tumour interface | 299316         | 179225     | 127500    | 76138      | 126899     | 45952      |
| -30 to -0                                       | Stroma                    | 598811         | 359337     | 257938    | 164075     | 144455     | 89846      |
| -60 to 30                                       | Stroma                    | 155405         | 90191      | 71943     | 52227      | 3691       | 19364      |
| -90 to -60                                      | Stroma                    | 63052          | 34494      | 27229     | 22389      | 995        | 6887       |
| -120 to -90                                     | Stroma                    | 31572          | 17255      | 12560     | 11408      | 449        | 3416       |
| -150 to -120                                    | Stroma                    | 17349          | 8971       | 6387      | 6202       | 217        | 1951       |
| (-150)                                          | Stroma                    | 28389          | 12192      | 11482     | 9706       | 261        | 3415       |

**Table S3.** Number of cells in different bins from the tumour stroma border.
